# Supplementary material for: Developing a novel high performance NaNbO3-based lead-free dielectric capacitor for energy storage applications
Source: Royal Society of Chemistry journal article supplement (doi:10.1039/c9se00836e), 2019-11-18
Supplement: c9se00836e1.pdf [file c9se00836e1.pdf]

## Supporting Information

### **Developing a novel high performance NaNbO<sub>3</sub>-based lead-free dielectric capacitor for energy storage application**

Mingxing Zhou,<sup>a,b</sup> Ruihong Liang,<sup>\*a,b</sup> Zhiyong Zhou,<sup>a,b</sup> and Xianlin Dong<sup>\*a,b,c</sup>

*<sup>a</sup> Key Laboratory of Inorganic Functional Materials and Devices, Shanghai Institute of Ceramics, Chinese Academy of Sciences, Shanghai 201800, P. R. China.*

***E-mail: liangruihong@mail.sic.ac.cn and xldong@mail.sic.ac.cn***

*<sup>b</sup> Center of Materials Science and Optoelectronics Engineering, University of Chinese Academy of Sciences, Beijing 100049, P. R. China.*

*<sup>c</sup> State Key Laboratory of High Performance Ceramics and Superfine Microstructure, Shanghai Institute of Ceramics, Chinese Academy of Sciences, Shanghai 200050, P. R. China.*

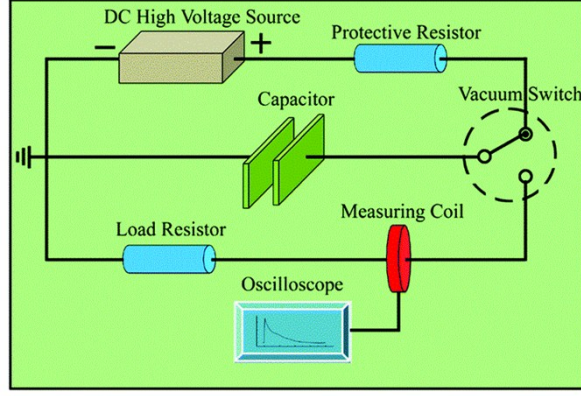

**Fig. S1** A schematic of the pulsed charge-discharge platform.<sup>1</sup>

In order to investigate the relaxor behavior for  $x$ BBKT-NN ceramics, the modified Curie-Weiss equation is given as follow:

$$\frac{1}{\varepsilon_r} - \frac{1}{\varepsilon_m} = \frac{(T - T_m)^\gamma}{C} \quad (\text{S1})$$

where  $\gamma$  is the diffuseness of a transition. The value of  $\gamma = 1$  indicates a normal ferroelectric with a sharp phase transition, and it representing an typical relaxor transition with large deviation from the Curie-Weiss law when  $\gamma = 2$ . The plot of  $\ln(1/\varepsilon_r - 1/\varepsilon_{\max})$  as a function of  $\ln(T - T_{\max})$  for  $x$ BBKT-NN ceramics at 100 kHz is displayed in Fig. S2 by linear fitting with modified Curie-Weiss equation to calculate the  $\gamma$  value. The data about 100 kHz were chose here to minimize any space charge contribution to the dielectric constant. The values of  $\gamma$  are 2.06, 2.02, 1.92, and 1.83 for  $x = 0.26, 0.28, 0.30$ , and  $0.32$ , respectively, which indicates strong relaxation behavior in  $x$ BBKT-NN ceramics.

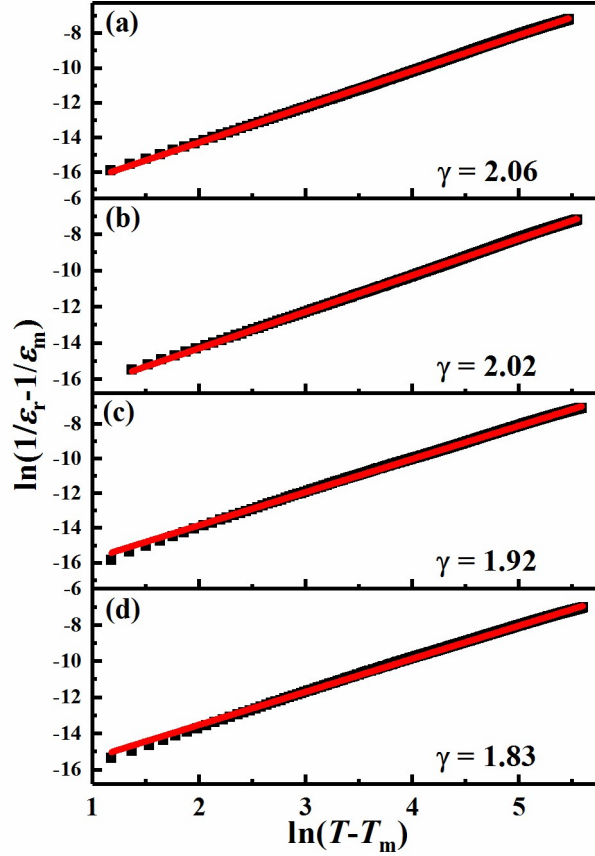

**Fig. S2** Plots of  $\ln(1/\epsilon_r - 1/\epsilon_{\max})$  versus  $\ln(T - T_m)$  for the  $x$ BBKT-NN ceramics.

To obtain the Burns temperature ( $T_B$ , the transition temperature at which polar nano-regions appear), the temperature dependence of dielectric constant are fitted by the Curie-Weiss law:

$$\epsilon_r = \frac{C}{T - T_{CW}} \quad (S2)$$

where  $C$  and  $T_{CW}$  are the Curie constant and Curie-Weiss temperature. The  $T_B$  value is determined as the temperature at which the reciprocal dielectric constant deviates from the Curie-Weiss relation on cooling. The data also measured at 100 kHz were used to eliminate the possible space charge effect. For the compositions with  $x = 0.26-0.32$ , the values of  $T_B$  are in the range 202-158 °C. The relatively high  $T_B$  values indicate that the  $x$ BBKT-NN ceramics belong to relaxor ferroelectric state at room temperature.

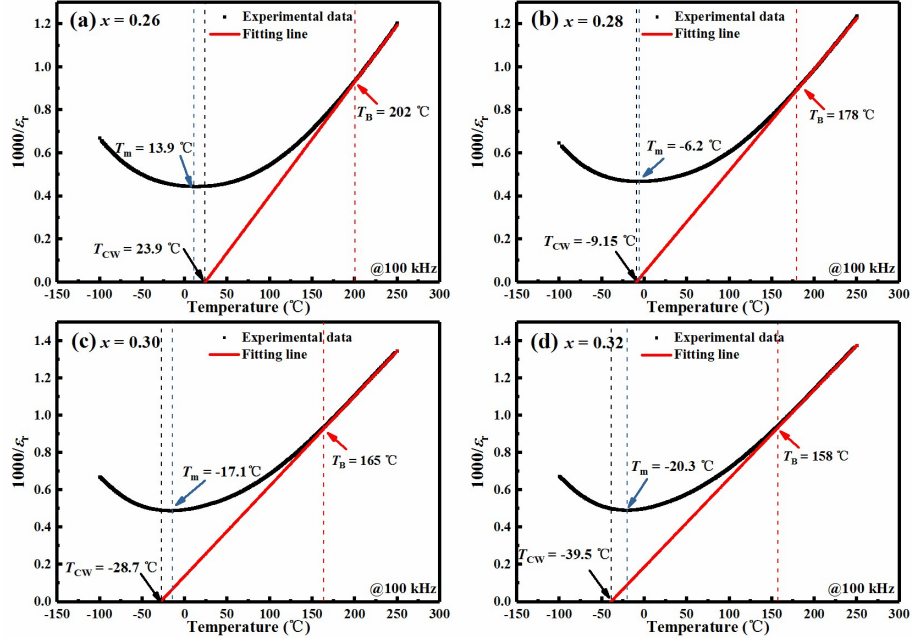

**Fig. S3**  $1000/\epsilon_r$  versus temperature curves of the  $x\text{BBKT-NN}$  ceramics. The experimental data were fitting by Curie-Weiss law (red lines).

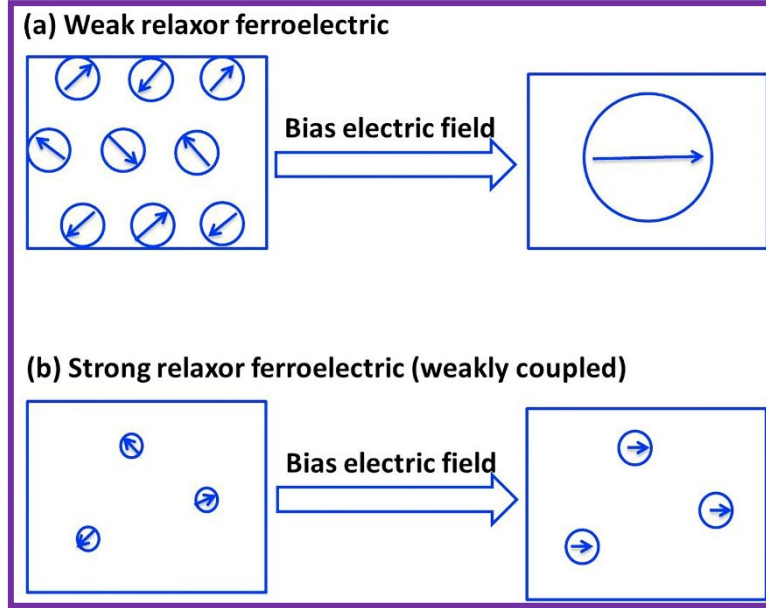

**Fig. S4** The evolution of polar nano-regions under a bias field for the (a) weak relaxor ferroelectric and (b) strong relaxor ferroelectric (weakly coupled).<sup>2</sup>

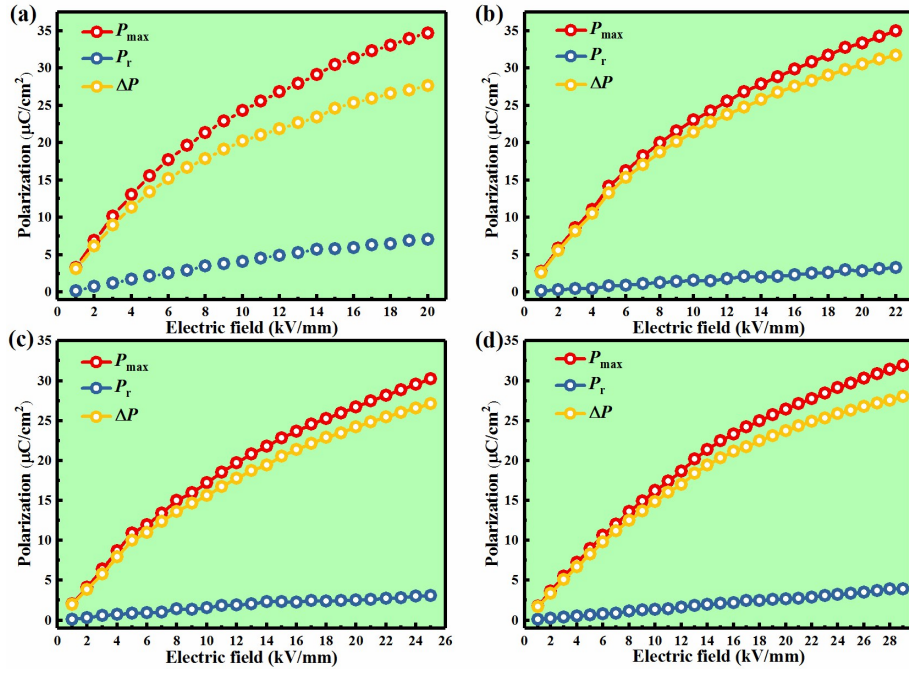

**Fig. S5** Electric field dependences of  $P_{\max}$ ,  $P_r$ , and  $\Delta P$  for the  $x$ BBKT NN ceramics: (a)  $x = 0.26$ , (b)  $x = 0.28$ , (c)  $x = 0.30$ , and (d)  $x = 0.32$ .

## References

1. Y. Li, N. Sun, J. Du, X. Li and X. Hao, *J. Mater. Chem. C*, 2019, **7**, 7692-7699.
2. X. Zhao, R. Liang, Z. Zhou and X. Dong, *Ceram. Int.*, 2017, **43**, 14473-14475.
